# Supplementary material for: The Impact of Chronic Comorbidities on Outcomes in Acute Exacerbations of Idiopathic Pulmonary Fibrosis
Source: MDPI journal article supplement (doi:10.3390/life14010156), 2024-01-21
Supplement: s1 [file s1]

# The Impact of Chronic Comorbidities on Outcomes in Acute Exacerbations of Idiopathic Pulmonary Fibrosis

Saqib H. Baig <sup>1,\*</sup> and Erika J. Yoo <sup>1</sup>

<sup>1</sup> Division of Pulmonary, Allergy and Critical Care Medicine, Jane and Leonard Korman Respiratory Institute, Sidney Kimmel Medical College, Thomas Jefferson University, 211 South 9th Street, Suite 401, Philadelphia, PA 19107, USA; erika.yoo@jefferson.edu

\* Correspondence: saqib.baig@jefferson.edu; Tel.: +1-443-825-9106

**Table S1.** Diagnostic codes used to identify chronic medical conditions.

|                        |                                                                                                                                                                                                                                                                                                                                                                                                                                                                                                         |
|------------------------|---------------------------------------------------------------------------------------------------------------------------------------------------------------------------------------------------------------------------------------------------------------------------------------------------------------------------------------------------------------------------------------------------------------------------------------------------------------------------------------------------------|
| Hypertension           | H35031, H35032, H35033, H35039, I110, I119, I120, I129, I130, I1310, I1311, I132, I150, I151, I152, I158, I159, I161, I674, O10111, O10112, O10113, O10119, O1012, O1013, O10211, O10212, O10213, O10219, O1022, O1023, O10311, O10312, O10313, O10319, O1032, O1033, O10411, O10412, O10413, O10419, O1042, O1043, O10911, O10912, O10913, O10919, O1092, O1093, O111, O112, O113, O114, O115, O119, O161, O162, O163, O164, O165, O169, I10, I160, I169, O10011, O10012, O10013, O10019, O1002, O1003 |
| Diabetes               | E08XXX – E13XXX<br>O24011, O24012, O24013, O24019, O2402, O2403, O24111, O24112, O24113, O24119, O2412, O2413, O24311, O24312, O24313, O24319, O2432, O2433, O24410, O24414, O24415, O24419, O24420, O24424, O24425, O24429, O24430, O24434, O24435, O24439, O24811, O24812, O24813, O24819, O2482, O2483, O24911, O24912, O24913, O24919, O2492, O2493                                                                                                                                                 |
| Obesity                | E6601, E6609, E661, E662, E668, E669, O99210, O99211, O99212, O99213, O99214, O99215, R939, Z6830, Z6831, Z6832, Z6833, Z6834, Z6835, Z6836, Z6837, Z6838, Z6839, Z6841, Z6842, Z6843, Z6844, Z6845, Z6854                                                                                                                                                                                                                                                                                              |
| Hypothyroidism         | E000, E001, E002, E009, E010, E011, E012, E018, E02, E030, E031, E032, E033, E034, E035, E038, E039, E890                                                                                                                                                                                                                                                                                                                                                                                               |
| Alcohol and drug abuse | F10XXX – F19XXX<br>G621, I426, K2920, K2921, K7010, K7011, O99310, O99311, O99312, O99313, O99314, O99315, O99320, O99321, O99322, O99323, O99324, O99325, O99320, O99321, O99322, O99323, O99324, O99325                                                                                                                                                                                                                                                                                               |
| Chronic kidney disease | I120, I1311, I132, N184, N185, N186, Z4901, Z4902, Z4931, Z4932, Z9115, Z940, Z992, N183, N1830, N1831, N1832, N189, N19                                                                                                                                                                                                                                                                                                                                                                                |
| Cardiovascular disease | I20XX – I25XX<br>I60XX – I69XX<br>I70XX – I75XX<br>P91821, P91822, P91823, P91829, G450, G451, G452, G453, G454, G458, G459, G460, G461, G462, G463, G464, G465, G466, G467, G468, H3400, H3401, H3402, H3403, H3410, H3411, H3412, H3413, H34211, H34212, H34213, H34219, H34231, H34232, H34233, H34239                                                                                                                                                                                               |
| Malignancy             | C00XXX – C80XXX<br>C7AXX<br>D469, E3121, E3122, E3123                                                                                                                                                                                                                                                                                                                                                                                                                                                   |

**Table S2.** Adjusted odds ratio (aOR) and Incidence rate ratios (IRR) of the factors used to adjust for analyzing impact of chronic comorbidities on in-hospital mortality and hospital LOS.

| Variable (Details on comparison group) | In-hospital mortality |           |         | Hospital LOS |           |         |
|----------------------------------------|-----------------------|-----------|---------|--------------|-----------|---------|
|                                        | aOR                   | 95% CI    | p-value | IRR          | 95% CI    | p-value |
| Age (for 10-year increase)             | 1.24                  | 1.09–1.40 | 0.00    | 0.91         | 0.87–0.95 | < 0.001 |
| Gender (Male)                          | 0.67                  | 0.55–0.82 | < 0.001 | 1.02         | 0.96–1.10 | 0.48    |
| Race (White)                           |                       |           |         |              |           |         |
| Black                                  | 0.91                  | 0.63–1.31 | 0.61    | 1.02         | 0.90–1.16 | 0.76    |
| Asian                                  | 0.59                  | 0.42–0.84 | 0.00    | 1.05         | 0.94–1.16 | 0.35    |
| Other                                  | 1.29                  | 0.93–1.80 | 0.13    | 1.06         | 0.93–1.20 | 0.41    |
| Income status (Very low-income group)  |                       |           |         |              |           |         |
| Low-income group                       | 0.72                  | 0.54–0.96 | 0.02    | 0.98         | 0.89–1.08 | 0.74    |
| Moderate-income group                  | 0.60                  | 0.45–0.80 | < 0.001 | 1.08         | 0.98–1.18 | 0.11    |
| High-income group                      | 1.19                  | 0.92–1.54 | 0.18    | 1.08         | 0.98–1.19 | 0.13    |
| Insurance status (Medicare)            |                       |           |         |              |           |         |
| Medicaid                               | 2.54                  | 1.56–4.15 | < 0.001 | 0.99         | 0.83–1.99 | 0.94    |
| Private                                | 1.90                  | 1.48–2.45 | < 0.001 | 1.10         | 1.00–1.21 | 0.06    |
| Other/self pay                         | 1.98                  | 1.22–3.20 | 0.00    | 0.90         | 0.74–1.10 | 0.30    |
| Calendar year (2016)                   |                       |           |         |              |           |         |
| Year 2017                              | 0.72                  | 0.58–0.91 | 0.00    | 0.93         | 0.86–1.01 | 0.09    |
| Year 2018                              | 0.83                  | 0.68–1.03 | 0.08    | 0.86         | 0.80–0.93 | < 0.001 |
| Number of procedures                   | 0.98                  | 0.96–1.01 | 0.19    | 1.10         | 1.09–1.11 | < 0.001 |
| Number of diagnosis codes              | 1.08                  | 1.06–1.10 | < 0.001 | 1.04         | 1.03–1.05 | < 0.001 |
| Academic hospital bed size (small)     |                       |           |         |              |           |         |
| Medium bed size                        | 0.90                  | 0.69–1.18 | 0.44    | 1.04         | 0.94–1.14 | 0.46    |
| Large bed size                         | 0.88                  | 0.69–1.12 | 0.30    | 1.15         | 1.05–1.25 | 0.00    |
| Hospital region (Northwest)            |                       |           |         |              |           |         |
| Midwest                                | 0.80                  | 0.61–1.06 | 0.12    | 0.71         | 0.65–0.78 | < 0.001 |
| South                                  | 0.96                  | 0.76–1.21 | 0.73    | 0.84         | 0.77–0.91 | < 0.001 |
| West                                   | 0.86                  | 0.66–1.13 | 0.28    | 0.71         | 0.65–0.78 | < 0.001 |
